# Supplementary material for: EGFR mutation status yield from bronchoalveolar lavage in patients with primary pulmonary adenocarcinoma compared to a venous blood sample and tissue biopsy
Source: PeerJ. 2021 May 14;9:e11448. doi: 10.7717/peerj.11448 (PMC8127956; doi:10.7717/peerj.11448)
Supplement: Supplemental Information 1 [file peerj-09-11448-s001.xlsx]

## Sheet: Sheet1
Number	Дата	ЕГН	Gender (1-female;2-male)	Years	Localization(left/right)	Highest tumor diameter	tissue	BAL	blood
6	43388	6210094094	1	56	left		Exon 19 deletion	del_ex19	WT
19	43403		2	71	right		Exon 21 L858R	L858R	WT
20	43403	5702248006	2	61	left		Exon 21 L858R	negative	WT
25	43406		1	62	left		Exon 19 deletion	del_ex19	WT
30	43413		1	76	left		Exon 21 L858R	L858R	WT
45	43500	7003300030	1	48	right	4.91	Exon18G719	del_ex19	del_ex19
14	43397	6206166131	1	56	right		Exon 19 deletion	del_ex19	del_ex19
91	43572	60342/2019	2	50	left/right	7.21	Exon 19 deletion	del_ex19/T790M	del_ex19/T790M
106	43608		1	62	right	8.09	Exon 19 deletion	del_ex19	del_ex19
109	43616	5601245312	1	63	left	4.99	Exon 19 deletion	del_ex19	WT
116	43630		1	62	left	3.85	Exon 19 deletion	del_ex19	del_ex19
120	43636	4304077159	1	76	left	3.25	Exon 21 L858R	del_ex19/L858	WT
135	43689		1	63	right	2.27	Exon 19 deletion	del_ex19	WT
74	43542	5210316266	2	66	right	3.93	Wild-type EGFR	WT	WT
81	43527	6412263483	2	54	right	8.09	Wild-type EGFR	WT	WT
90	43571	6307254441	2	55	right	7.77	Wild-type EGFR	WT	WT
93	43578		1	71	right		Wild-type EGFR	WT	WT
95	43585	6004072680	2	59	left		Wild-type EGFR	WT	WT
105	43607	4511107064	2	73	right	5.24	Wild-type EGFR	WT	WT
111	43620	5510043286	2	63	left	4	Wild-type EGFR	WT	WT
112	43590	6004252634	1	59	left	3.43	Wild-type EGFR	WT	WT
113	43623	5303156620	2	66	left	6.53	Wild-type EGFR	WT	WT
119	43636	5001026293	1	69	right		Wild-type EGFR	WT	WT
122	43642	5510044003	2	63	right	12.37	Wild-type EGFR	WT	WT
126	43656	5111046388	2	67	left	2.45	Wild-type EGFR	WT	WT
128	43663	4408132200	2	74	left	5.61	Wild-type EGFR	WT	WT
